# Supplementary material
Source: Research Square preprint supplement (doi:10.21203/rs.3.rs-8912367/v1)
Supplement: Supplementary file 1 [file bbdd1577623ee55ffbf414fa.docx]

**Myeloid–Treg Crosstalk Disruption by Photochemical Activation and Immune Checkpoint Therapy Triples Median Survival in a Pancreatic Cancer Model**

Mohammad A. Saad1, Derek Allen1, Tessa D. van Bergen1,2†, Jimena Nicolás Morala1,3‡, Harrison J. Roberts1, Zhiming Mai1, Vinay Chandrasekhara4, Kenneth K. Wang4, Edward V. Maytin5, Bryan Q. Spring6,7, Haidong Dong8,9, and Tayyaba Hasan1,10*

1 Wellman Center for Photomedicine, Massachusetts General Hospital and Harvard Medical School; Boston, Massachusetts 02114, USA.

2†Current address: Computational Imaging Group for MR Diagnostics and Therapy, Center for Image Sciences, University Medical Center Utrecht, Utrecht, The Netherlands

3‡ Current address: Department of Biology, Faculty of Sciences, Universidad Autónoma de Madrid, Madrid, Spain

4 Division of Gastroenterology and Hepatology; Mayo Clinic, Rochester, MN, USA

5 Department of Biomedical Engineering, Lerner Research Institute, Cleveland Clinic; Cleveland, OH, USA

6 Department of Physics, Northeastern University; Massachusetts, USA

7 Department of Bioengineering, Northeastern University; Massachusetts, USA

8 Department of Immunology, Mayo Clinic; Rochester, Minnesota, USA

9Department of Urology, Mayo Clinic; Rochester, Minnesota, USA

10 Division of Health Sciences and Technology, Harvard University and Massachusetts Institute of Technology; Cambridge, Massachusetts 02139, USA.

***** Correspondence: thasan@mgh.harvard.edu

Tayyaba Hasan Ph.D.

Professor of Dermatology

Professor of Health Sciences and Technology (Harvard-MIT)

Wellman Center for Photomedicine, Harvard Medical School

Massachusetts General Hospital

40 Blossom Street, (Bartlett 314), Boston, MA 02114

Phone: +1 (617)-726-6996

FAX: +1 (617)-724-1345


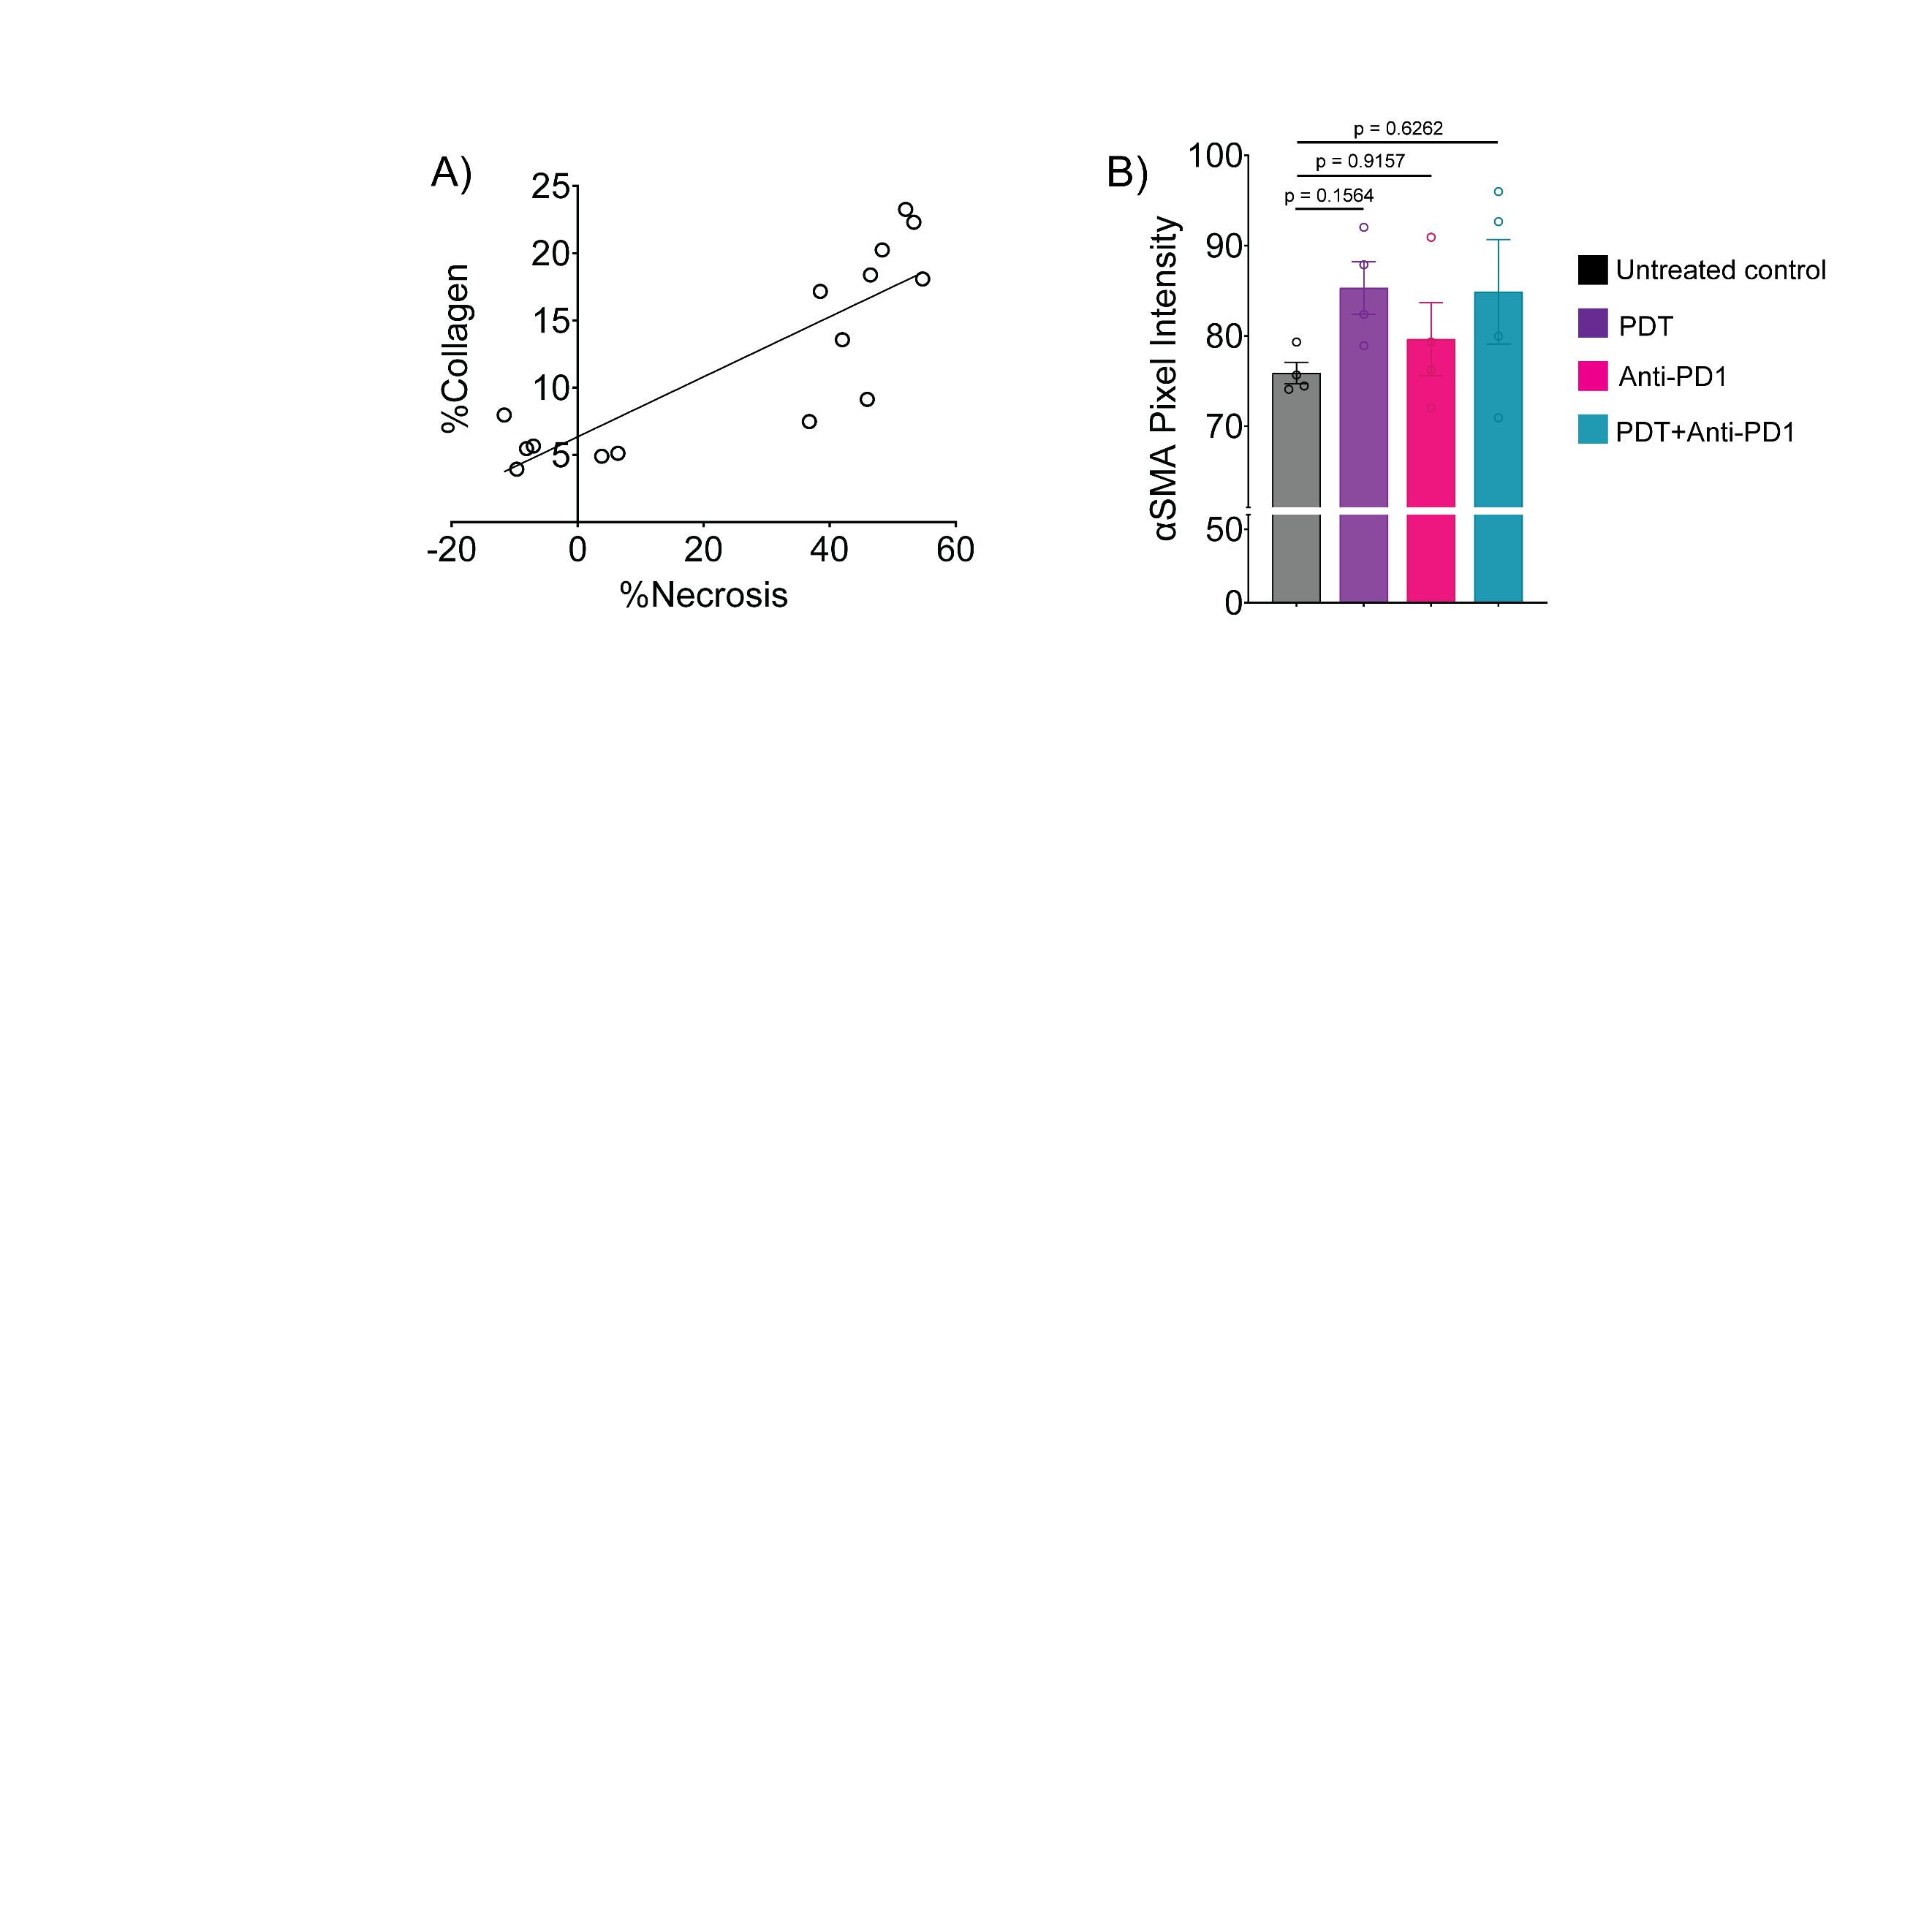


**Fig. S1:** **PDT induces necrosis and modulates tumor stroma. (A)** Correlation between necrosis and %collagen across different treatment groups. The %collagen area coverage positively correlated with the degree of necrosis (R squared = 0.7071, p < 0.0001), suggesting that the increased collagen content in the treated tumors which also show a high degree of necrosis and may possibly be a due to a wound healing response. **(B)** Fluorescence signal intensity of αSMA from immunofluorescence images of different treatment groups. PDT treatment, either as monotherapy or in combination with anti-PD1, resulted in an increase (not significant) in αSMA signal intensity suggesting a polarization towards myofibroblastic CAF (myCAF) phenotype. Data are presented as mean ± SD (n = 4 animals per group), analyzed using Welch’s one-way ANOVA followed by Dunnett’s T3 multiple-comparisons test. P-values are provided for each graph.

**Fig. S2:** **Verteporfin distribution in major cellular populations in orthotopic KPC tumors.** **(A)** Flow cytometry plots of tumors from control mice (gray bars in B-J) and mice administered with verteporfin. **(B-J)** Representative histograms showing verteporfin uptake in total tumor cells **(B)**, CD140+ cells **(C)**, KPC-mcherry cells **(D)**, F4-80+ cells **(E)**, CD11c+ cells **(F)**, CD11c+F480+ cells **(G)**, CD31+ cells **(H)**, CD4+ T-cells **(I)**, and CD8+ T-cells **(J)**. Data are presented as mean ± SD (n ≥ 4 animals per group), analyzed using Welch’s t-test. P-values are provided for each graph.


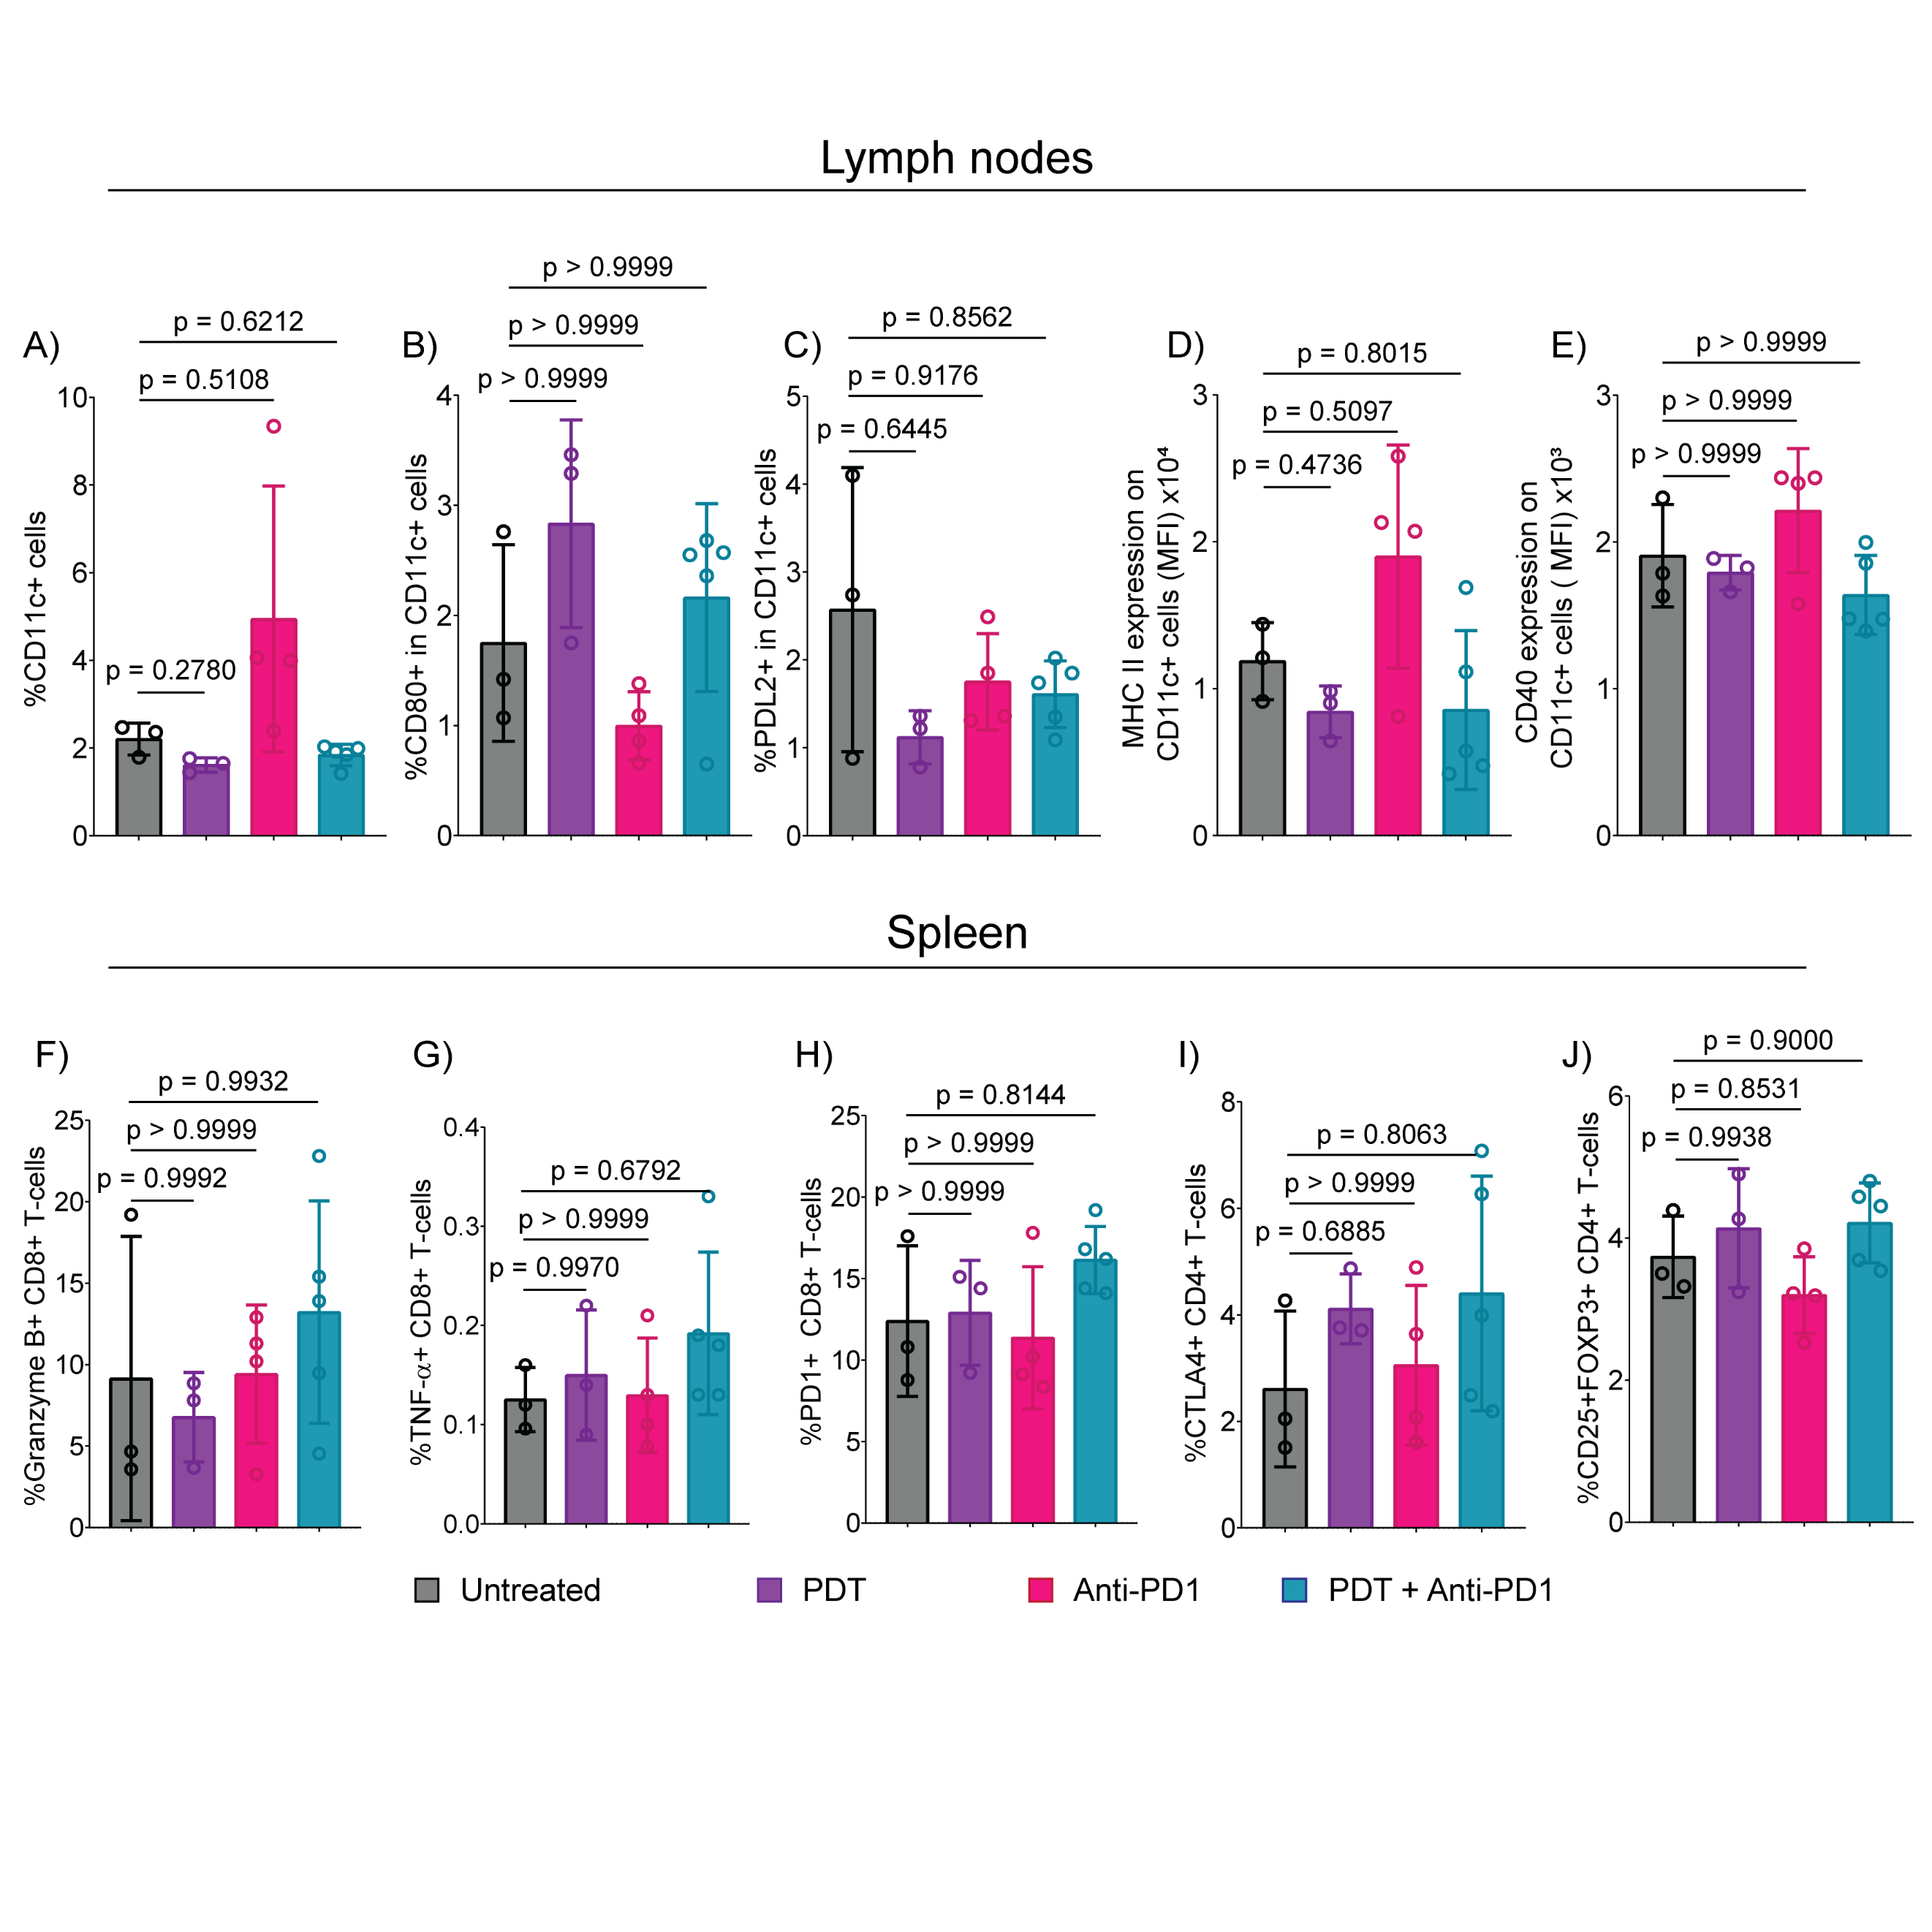


**Fig. S3:** **Status of CD11c+ cells in lymph nodes and CD8+ T-cells in spleen after PDT and anti-PD1 therapy.** **(A-E)** Flow cytometry analysis of the activation status of CD11c+ cells in the lymph nodes of untreated or treated orthotopic pancreatic tumor bearing mice. Non-significant differences were observed across all cell types from the different treatment groups. **(F-J)** Flow cytometry analysis of CD8+ T-cell activation status in the spleen of untreated or treated orthotopic pancreatic tumor bearing mice. Non-significant differences were observed across all cell types from the different treatment groups.Data are presented as mean ± SD (n = 3-5 per group), analyzed using Welch’s one-way ANOVA followed by Dunnett’s T3 multiple-comparisons test, except for (B and E) which are analyzed using Kruskal-Wallis test with Dunn’s multiple comparisons test. P-values are provided for each graph.


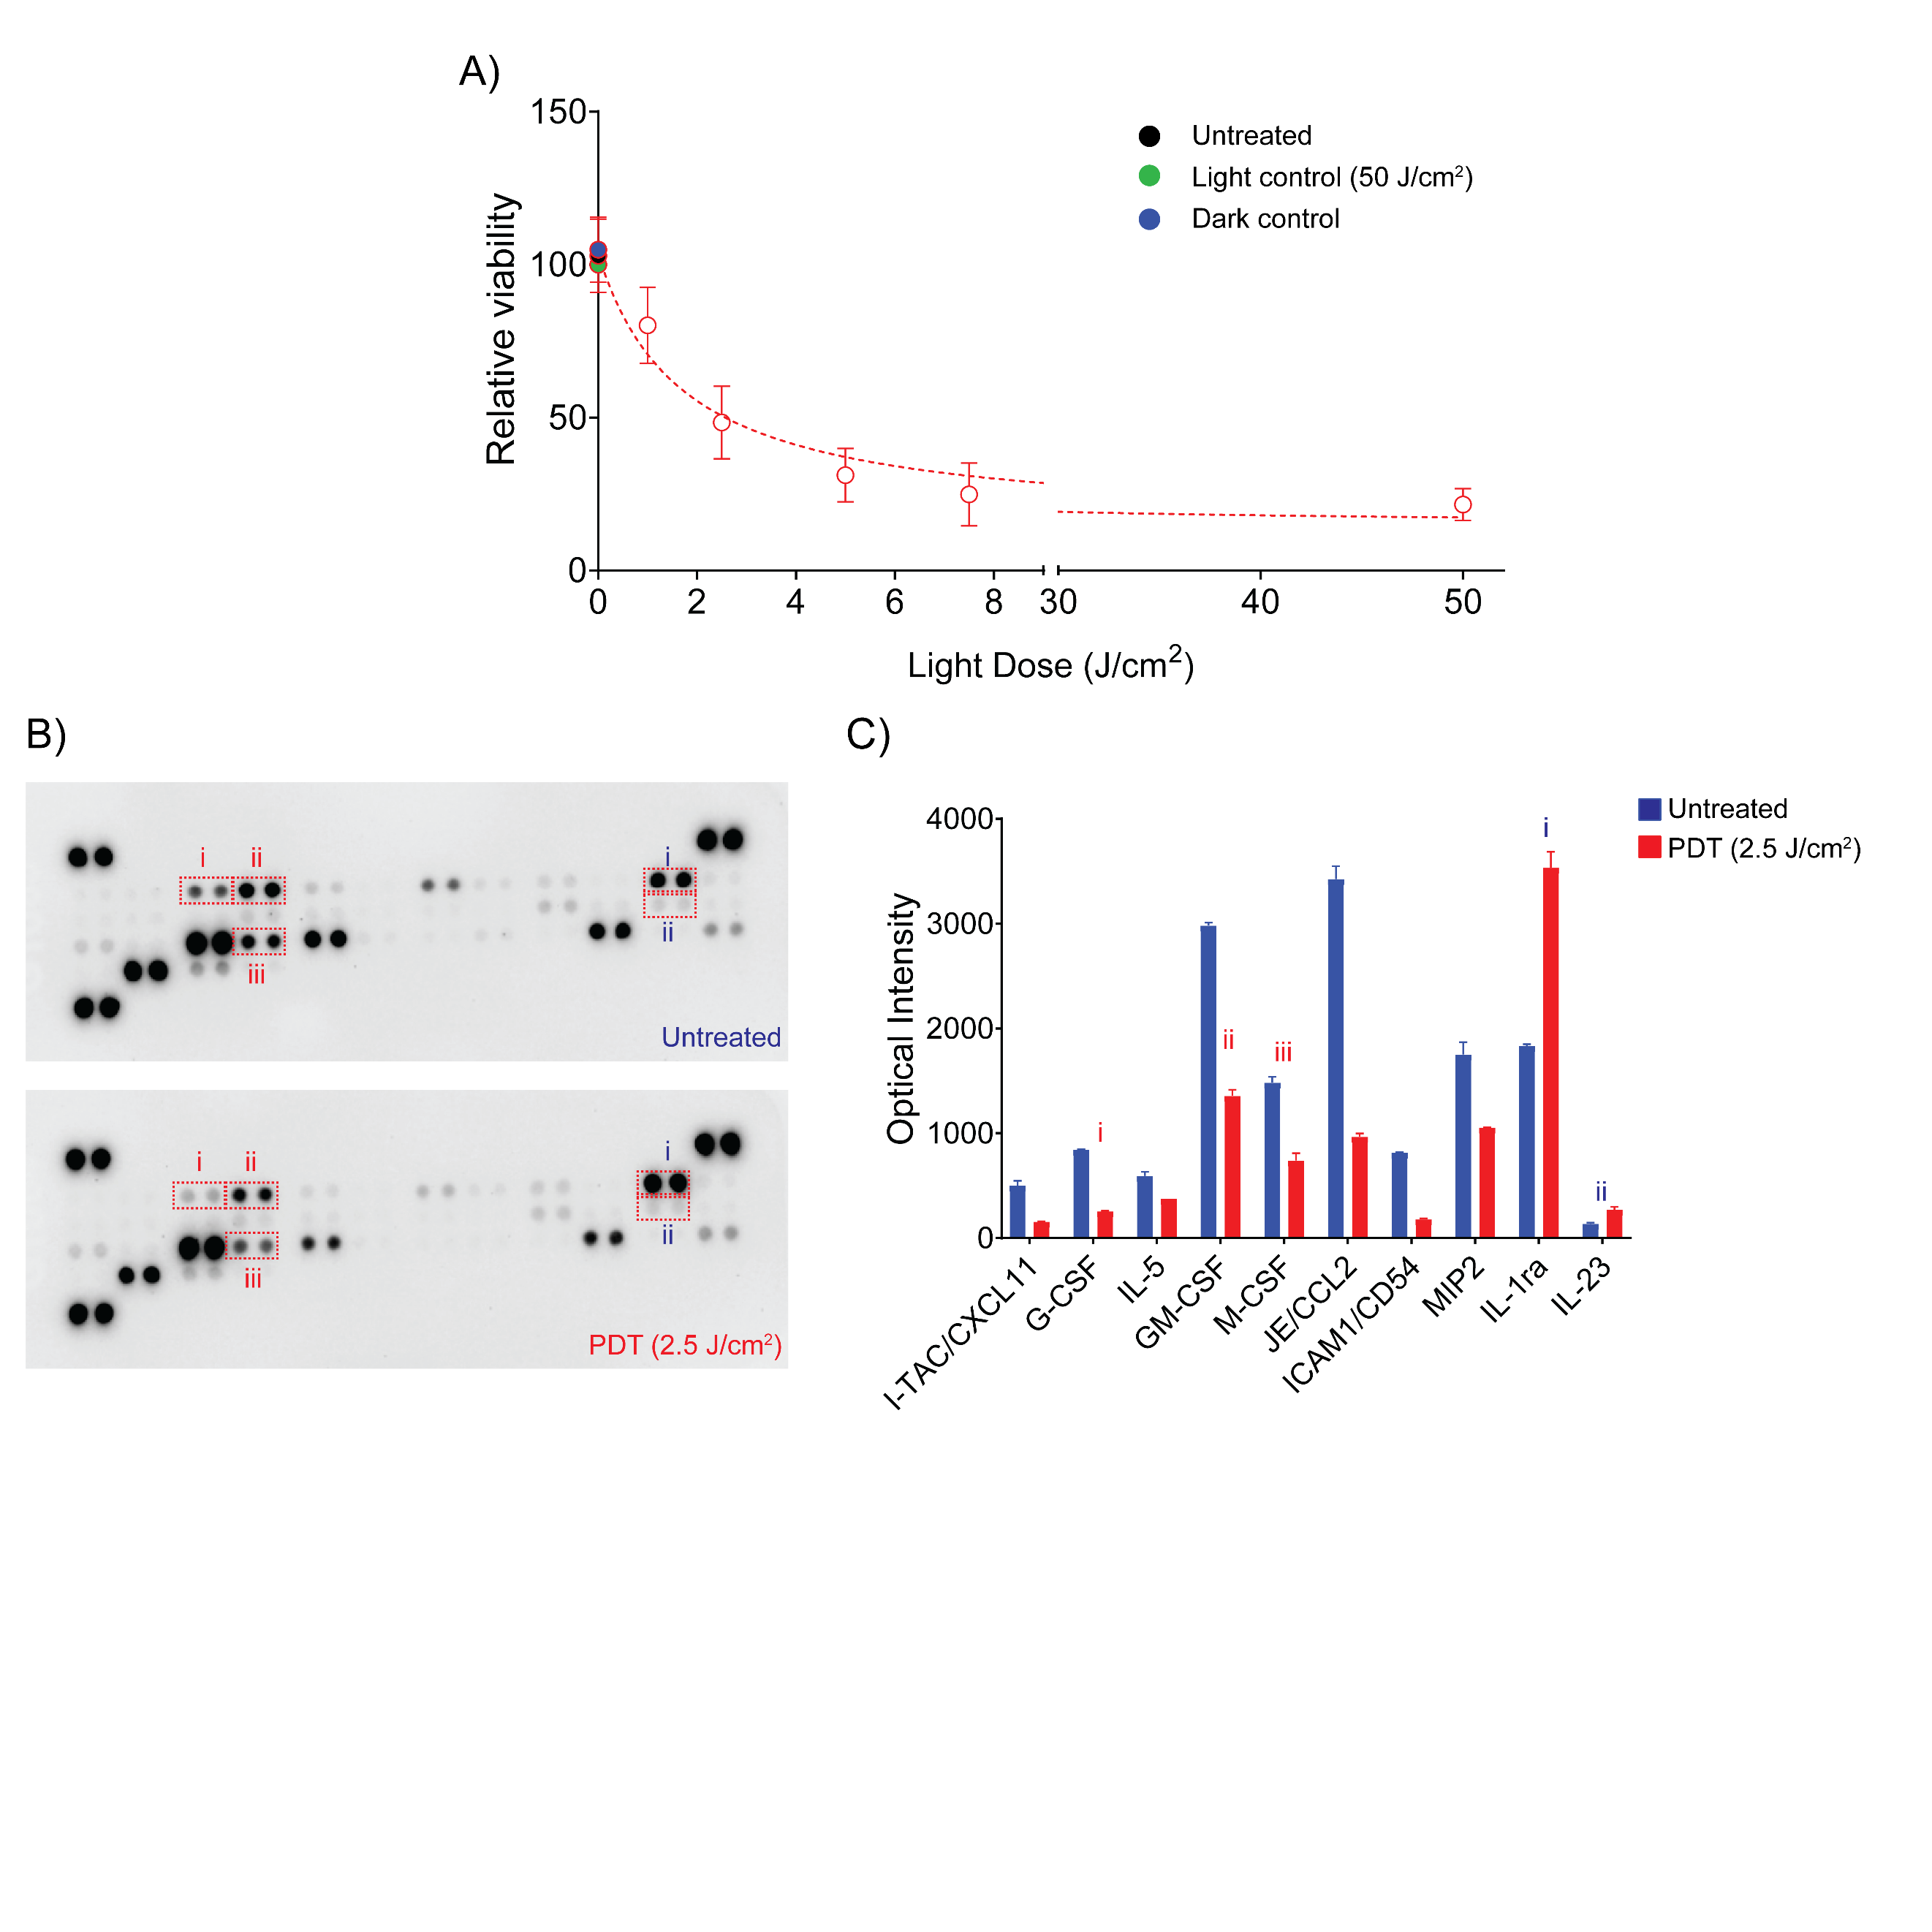


**Fig. S4:** **Photodynamic therapy inhibits secretion of immune suppressive cytokines in in vitro cultures of KPC cells. (A)** Light dose response of 2D cultured KPC cells treated with photodynamic therapy (PDT) using 250 nM of Verteporfin. Data are represented as mean and standard deviation from independent experiments. **(B)** Representative image of the cytokine array with and without treatment with PDT. **(C)** Quantification of cytokines in conditioned medium from KPC cells (n=2 independent experiments). Blue and red bars represent untreated, and PDT treated groups, respectively. Data are represented as mean from 2 independent experiments.


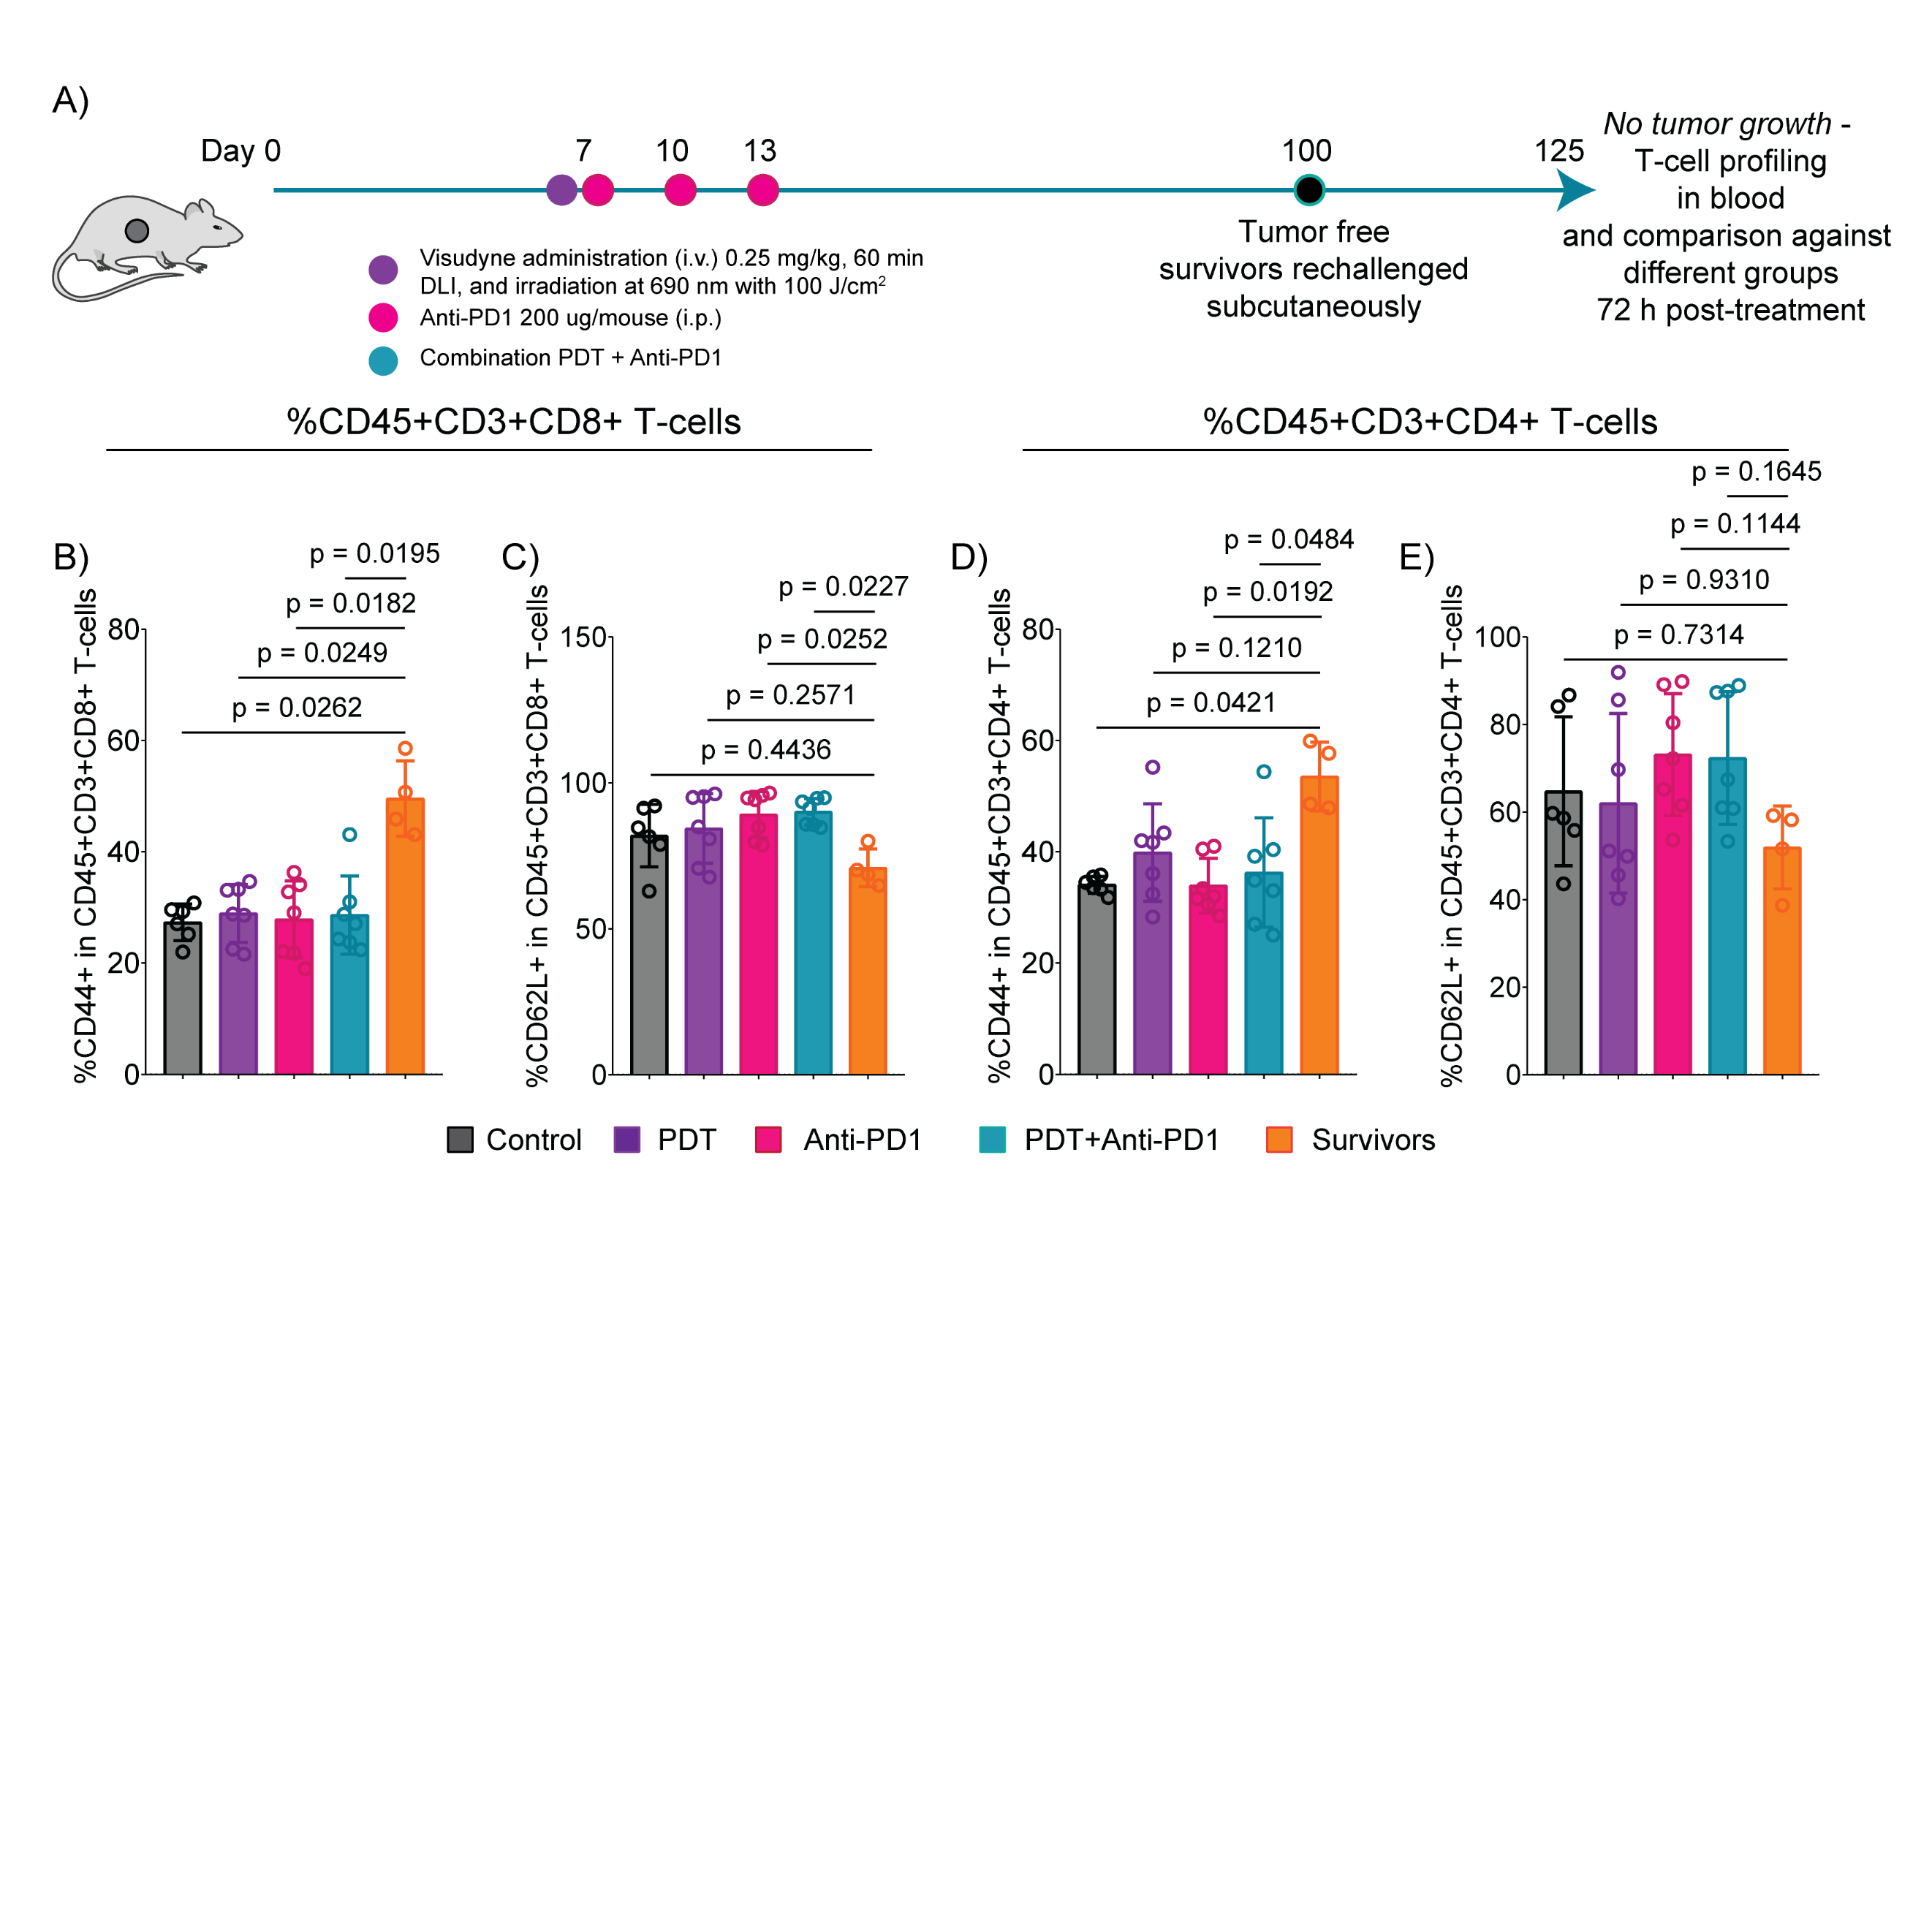


**Fig. S5:** **PDT induces long-term memory responses in tumor-free survivors.** **(A)** Timeline of tumor development, treatment, re-challenge and comparative FACS analysis of PBMCs from different treatment groups (i) no treatment, (ii) PDT (day 7 post-implantation (verteporfin - 0.25 mg/kg; 690 nm light at 100 mW/cm2 to achieve 100 J/cm2), (iii) Anti-PD1 (200 µg/mouse, three doses on days 7, 10, and 13 post-implantation), (iv) PDT+anti-PD1, and (v) surviving mice. The surviving mice were from the long-term survival study. **(B)** Flow cytometry analysis of %CD44+ memory cells in CD8+ T-cell populations and **(C)** %CD62L+ naïve cells in CD8+ T-cells in the blood of mice from different treatment groups. **(D)** Flow cytometry analysis of %CD44+ memory cells in CD4+ T-cells and **(E)** %CD62L+ naïve cells in CD4+ T-cells in the blood of mice from different treatment groups. Data are presented as mean ± SD (n = 4-6 per group), analyzed using Welch’s one-way ANOVA followed by Dunnett’s T3 multiple-comparisons test. P-values are provided for each graph.

**Supplementary Table S1: Antibodies Used for Immunofluorescence**

| **Primary Antibodies** | | | | |
| --- | --- | --- | --- | --- |
| **Target** | **Vendor** | **Cat#** | **Clone** | **Dilution** |
| Cytokeratin 19 | Abcam | ab52625 | EP1580Y | 1:2000 |
| CD11c- Alexa Fluor 555 conjugate | Cell Signaling Technologies | 64675S | D1V9Y | 1:200 |
| CD11c-Alexa Fluor 647 conjugate | Cell Signaling Technologies | 88204S | D1V9Y | 1:200 |
| CD8 | Abcam | ab237723 | CAL38 | 1:200 |
| Alpha-Smooth Muscle Actin-FITC | Abcam | ab8211 | 1A4 | 1:200 |
| Pan-Keratin-Alexa Fluor 488 conjugate | Cell Signaling Technologies | 4523S | C11 | 1:500 |
| CD3 | Abcam | ab135372 | SP162 | 1:200 |
| FOXP3-eFluor 570 | Invitrogen | 41-5773-82 | FJK-16s | 1:50 |
| CD4-Alexa Fluor 647 | Abcam | ab225310 | EPR19514 | 1:200 |
| Ki-67-Alexa Fluor 647 | Cell Signaling Technologies | 12075 | D3B5 | 1:200 |
| **Secondary Antibodies** | | | | |
| **Target** | **Vendor** | **Cat#** |  | **Dilution** |
| anti-Rabbit 488 | Thermo Fisher Scientific | A32731 |  | 1:500 |
| anti-Rabbit 555 | Thermo Fisher Scientific | A21428 |  | 1:500 |
| anti-Rabbit 647 | Thermo Fisher Scientific | A32733 |  | 1:500 |
| **Isotype Controls** | | | | |
| **Target** | **Vendor** | **Cat#** | **Clone** | **Dilution** |
| Rabbit IgG | Abcam | ab172730 | EPR25A | 1:1000 |
| Rabbit IgG-Alexa Fluor 647 | Cell Signaling Technologies | 2985S | DA1E | 1:200 |
| Rabbit IgG-Alexa Fluor 488 | Invitrogen | 53-4616-82 | RbNP15 | 1:100 |
| Rat IgG2a-eFluor570 | eBioscience | 41-4321-82 | eBR2a | 1:50 |
| Mouse IgG1 kappa-Alexa Fluor488 | eBioscience | 53-4714-80 | P3.6.2.8.1 | 1:1000 |

**Supplementary Table S2: Antibodies Used for Flow cytometry**

| **Antibody Dye** | **Vendor** | **Clone** | **Dilution** | **Isotype** |
| --- | --- | --- | --- | --- |
| anti-CD11c-APC | Miltenyi Biotech | REA754/ N418 | 1:50 | recombinant human IgG1 |
| anti-F4/80-PEVio770 | Miltenyi Biotech | REA126/ BM8 | 1:50 | recombinant human IgG1 |
| anti-CD140 (PDGFRα)-Viobright FITC | Miltenyi Biotech | REA634/ APB5 | 1:50 | recombinant human IgG1 |
| anti-CD4-APC | Miltenyi Biotech | REA1211/RM4-4 | 1:50 | recombinant human IgG1 |
| Anti-CD31-PEVio770 | Miltenyi Biotech | REA784/390 | 1:50 | recombinant human IgG1 |
| anti-CD8-Viobright FITC | Miltenyi Biotech | REA601/ 53-6.7 | 1:50 | recombinant human IgG1 |
| Anti-CD11c-APC | Miltenyi Biotech | REA754/N418 | 1:50 | recombinant human IgG1 |
| Anti-CD80-FITC | Miltenyi Biotech | REA983/ 16-10A1 | 1:50 | recombinant human IgG1 |
| Anti-CD86-PE | Miltenyi Biotech | REA1190/PO3.3 | 1:50 | recombinant human IgG1 |
| Anti-CD40-PE-Vio770 | Miltenyi Biotech | REA965/ FGK45.5 | 1:50 | recombinant human IgG1 |
| Anti-CD273 (PD-L2)-PerCP-Vio700 | Miltenyi Biotech | REA986/ MIH37 | 1:50 | recombinant human IgG1 |
| Anti-MHC-II-VioBlue | Miltenyi Biotech | REA813/ M5/114.15.2 | 1:50 | recombinant human IgG1 |
| IFN-Gamma-APC | Miltenyi Biotech | REA638/ AN.18.17.24 | 1:50 | recombinant human IgG1 |
| TNF-Alpha-FITC | Miltenyi Biotech | REA636/ MP6-XT22 | 1:50 | recombinant human IgG1 |
| Granzyme B-PE | Miltenyi Biotech | REA226/ GB11 | 1:50 | recombinant human IgG1 |
| Anti-PD1-PerCP-Vio700 | Miltenyi Biotech | REA802/ HA2-7B1 | 1:50 | recombinant human IgG1 |
| Anti-CD8-PE-Vio770 | Miltenyi Biotech | REA734/ HIT8a | 1:50 | recombinant human IgG1 |
| anti-FOXP3-APC | Miltenyi Biotech | REA788/ 3G3 | 1:50 | recombinant human IgG1 |
| anti-CD25-VioBright FITC | Miltenyi Biotech | REA568/ 7D4 | 1:50 | recombinant human IgG1 |
| Anti-CTLA4 (CD152)-PE | Miltenyi Biotech | REA984/ UC10-4B9 | 1:50 | recombinant human IgG1 |
| anti-CD4-PE-Vio770 | Miltenyi Biotech | REA604/ RM4-5 | 1:50 | recombinant human IgG1 |
| CD45-Viogreen | Miltenyi Biotech | REA737/ 30F11 | 1:50 | recombinant human IgG1 |
| antiCD3-Vioblue | Miltenyi Biotech | REA641/ 17A2 | 1:50 | recombinant human IgG1 |
| CD4-PE-Vio770 | Miltenyi Biotech | REA604/ RM4-5 | 1:50 | recombinant human IgG1 |
| CD8-FITC | Miltenyi Biotech | 53-6.7 | 1:50 | rat IgG2aκ |
| CD44-APC | Miltenyi Biotech | REA664/ IM7.8.1 | 1:50 | recombinant human IgG1 |
| CD62L-Texas Red | Thermo Fisher Scientific | MEL-14 | 1:50 |  |
| Fixable Viability Dye eFluor™ 780 | eBioscience |  | 1:2500 |  |

| **Isotype Controls** | | | |
| --- | --- | --- | --- |
| **Antibody Dye** | **Vendor** | **Clone** | **Dilution** |
| recombinant human IgG1-APC | Miltenyi Biotech | REA293/ IS5-21F5 | 1:50 |
| recombinant human IgG1-PEVio770 | Miltenyi Biotech | REA293/ IS5-21F5 | 1:50 |
| recombinant human IgG1-Viobright FITC | Miltenyi Biotech | REA293/ IS5-21F5 | 1:50 |
| recombinant human IgG1-FITC | Miltenyi Biotech | REA293/ IS5-21F5 | 1:50 |
| recombinant human IgG1-PE | Miltenyi Biotech | REA293/ IS5-21F5 | 1:50 |
| recombinant human IgG1-PerCP-Vio700 | Miltenyi Biotech | REA293/ IS5-21F5 | 1:50 |
| recombinant human IgG1-Viogreen | Miltenyi Biotech | REA293/ IS5-21F5 | 1:50 |
| recombinant human IgG1-APC | Miltenyi Biotech | REA293/ IS5-21F5 | 1:50 |
| recombinant human IgG1-VioBlue | Miltenyi Biotech | REA293/ IS5-21F5 | 1:50 |
| rat IgG2aκ | Miltenyi Biotech | ES26-15B7.3 | 1:50 |
