# Supplementary material
Source: Research Square preprint supplement (doi:10.21203/rs.3.rs-8912367/v1)
Supplement: Supplementary file 2 [file ffdb547dc5f882ee8788997a.xlsx]

## Sheet: Figure 2D-F
	Figure 2C					Figure 2D					Figure 2E
											Control																PDT													Anti-PD1
	Control	PDT	Anti-PD1	PDT + Anti-PD1		Control	PDT	Anti-PD1	PDT + Anti-PD1		Day/MET	1	2	3	4	5	6	7	8	9	10	11	12	13	14		1	2	3	4	5	6	7	8	9	10	11	12		1	2	3	4	5	6	7	8	9	10
	1479.76	1144.19	622.768	553.595		6959.6	4428.48	2262.2	1567.12		0	0	0	0	0	0	0	0	0	0	0	0	0	0	0		0	0	0	0	0	0	0	0	0	0	0	0		0	0	0	0	0	0	0	0	0	0
	1416.55	690.377	576.161	296.488		4993.91	4081.47	875.727	564.674		7	6.61243	14.5732	5.54044	3.48103	2.96399	3.65601	6.50099	14.5452	11.7355	11.6883	8.81111	14.416	12.366	12.0152		26.4004	14.3284	4.03275	5.63269	6.75195	4.86703	8.12605	13.3915	19.229	12.7478	48.7668	64.5394		3.10654	10.0535	4.91779	7.54426	17.8436	9.73778	7.60333	7.56743	50.4141	8.53592
	888.7	371.81	350.172	180.863		4367.04	3482.38	691.814	98.4036		14	52.9118	22.3324	105.356	96.1596	80.0281	157.489	360.885	298.701	24.012	328.913	230.975	183.456	41.5554	347.788		7.1186	114.784	98.9724	75.6146	109.597	44.1825	87.5205	263.919	363.665	52.3835	81.2154	128.93		63.6593	135.594	100.764	94.1718	125.344	111.76	16.9726	86.741	136.099	93.8412
	764.666	311.823	304.386	149.282		3385.71	3317.01	610.502	67.0874		21	218.627	650.992	890.266	480.483	385.08	352.069	603.872	1124.99	371.223	1531.1	530.099	1243.73	471.342	729.517		216.355	871.536	1088.32	577.321	217.067	76.0391	961.07	1054.55	1222.2	435.762	562.187	820.517		150.137	195.667	177.041	650.65	55.3772	31.7243	78.0001	72.1847	71.2384	27.8746
	701.686	211.172	275.818	130.454		3213.7	3058.14	549.76	54.8199		28	1729.35	1732.38	4188.47	1257.11	592.599				1382.89		2026.32		1259.25	2218.62		767.548			1327.33	569.126	780.255	773.218			886.626	794.511	700.739		185.855	250.831	280.006	1013.12	37.9994	49.3401	609.559	73.2008	31.8051	189.907
	651.376	198.207	241.893	93.8718		3156.58	2152.28	182.575	8.29161		35																						1814.26				1138.75			740.616	674.493	1019.89	1862.41	91.6647	285.1	644.034	346.804	103.058	145.064
	330.769	194.993	228.853	82.0399		2007.41	1230.66	161.848	-13.5293		42																													1480.53	2434.42	1880.06	2993.58	114.682	371.233	1751.63	830.798	208.601	350.062
	312.509	99.769	214.65	50.203		1946.26	1171.34	98.8866	-20.6404		49																																3180.18	166.931	1912.96		1504.7	416.805	937.464
	309.521	66.5385	175.503	48.5779		1739.91	1052.81	41.3064	-27.3124		56																																	280.714				725.17	1234.1
	142.774	59.9605	169.963	24.7253		1607.91	719.513	6.68015	-57.0455		63																																	1591.68				1211.44
	98.8236	26.7172	-2.91693	-0.94786		1554.4	490.628	5.19369	-63.0458		70																																					1535
	85.7973	-73.0361	-17.6836	-16.6307		1068.18	118.083	-2.3174	-63.6245		77
	53.2427		-38.5123	-22.2136		862.989		-55.7737	-64.8969
	10			-34.9649		721.524			-65.3447
				-49.5149					-71.4851
				-90.2573					-72.1869
[truncated: 31 more columns]

## Sheet: Figure 3D, F, H, J, and L
		Figure 2D					Figure 2F						Figure 2H						Figure 2J						Figure 2L
		Control	PDT	Anti-PD1	PDT + Anti-PD1		Isotype	Control	PDT	Anti-PD1	PDT + Anti-PD1		Isotype	Control	PDT	Anti-PD1	PDT + Anti-PD1		Isotype	Control	PDT	Anti-PD1	PDT + Anti-PD1		Control	PDT	Anti-PD1	PDT + Anti-PD1
		2.8	16.7071	49.85	53.3388		0	42.5189	14.2284	21.7912	5.42558		0	56.2911	31.3035	47.4733	6.27178		0.102173	4.7444	5.36753	6.75537	10.9469		5.464	9.127	5.145	13.566
		4.72	14.194	48.32	52.061		0	39.2793	8.35391	44.7885	5.1995		0	57.148	28.1646	69.0662	21.6852		0.056314	5.17959	4.53885	13.7023	5.62816		3.933	7.476	7.967	22.295
		6.399	20.03	38.5122	41.077		0	48.8681	7.91308	27.2069	4.92289		0	53.3214	17.7222	72.3175	20.7741		0.005257	7.22285	11.433	13.0113	4.78636		4.897	17.154	6	23.255
		3.8324	-11.6	45.95	46.477		0	33.6736	13.6334	22.6044	5.49239		0	65.0927	18.1294	50.5065	14.3874		0.02297	2.03306	10.6251	9.3004	2.56524		5.118	20.243		18.085
		-9.66281			54.7433				16.5052						10.0632						4.58529					5.654		18.383
		-7.01953			42.0039																							7.053
																												8.264

## Sheet: Figure 4C
	TME composition										Verteporfin distribution in TME
	CD11c+	5	6.35	6.79	3.51	2.32	2.09	8.92	4.04		CD11c+	42.8	46.9	47.5	38.6
	F4-80+	4.14	6.62	4.67	2.82	1.89	1.54	5.97	3.28		F4-80+	54.3	56.5	55.9	58
	CD11c+F4-80+	1.66	2.2	1.55	0.98	0.75	0.55	2.06	1.15		CD11c+F4-80+	45.1	41.1	34.8	35
	CD4+	2.2	3.51	2.98	3.82	2.25	0.83	2.45	4.4		CD4+	2.82	3.73	3.79	4.01
	CD8+	1.38	1.14	0.83	1.54	0.35	0.7	1.64	1.48		CD8+	0.9	2.01	4.86	2.29
	CD31+	6.05	10.7	9.54	7.91	3.85	2.89	8.99	10.1		CD31+	6.15	7.71	4.94	5.96
	CD140	16.5	17.4	3.74	4.09	6.77	6.99	24.3	6.16		CD140	23.2	35.2	29.7	18.7
	PDAC mcherry+	2.06	1	0.74	1.94	0.85	0.29	0.75	1.02		PDAC mcherry+	9.62	24.2	27.6	20.6

## Sheet: Figure 5C-E
	Figure 5C						Figure 5D						Figure 5E
	Isotype	Control	PDT	Anti-PD1	PDT + Anti-PD1		Isotype	Control	PDT	Anti-PD1	PDT + Anti-PD1		Control	PDT	Anti-PD1	PDT + Anti-PD1
	0	11.8635	2.26464	7.5706	2.552		0.031432		2.12975	4.81238	1.98905		5.9	16.8	31.6	210.7
	0	25.5027	0.239879	22.1152	7.05343		0	14.069	1.02763	14.1794	5.37994		12.2	5.8	35.5	90.4
	0.610501	41.0867	1.53846	40.3297	6.91299		0.049955	7.47916	3.07692	11.8918	2.97974		17.5	6.9	5.3	40.2
	0.180636	21.8274	0.549228	13.5891	2.93191			8.5978	1.65268	6.28683	3.36712		14.6	17.2	50.1	535.2
		15.1285	1.42484	13.5835	1.65635			14.2819	6.13902	9.31072	1.32821		50	5.7	63.6	59.2
		11.5046	0.938478	8.30741	0.708383			14.5317	3.97476		5.4828		8.7	14.2	87.2	451.1
								12.7282					9.3	6	17.1	15.8
													33.9	10.8	15.9	6.2
													19.8	12.3	8.2	23.8
													48.9	13.7	6.9	9.9
													8.6	7.8	70.3	80.3
													10.4	48	12.9	43.3
													7.4	7	26.2	17.1
													12.9	14.5	20.7	89.2
													9.5	8.5	91.3	77.6
													8.9	10.2	54.2	124.3
													36.4	6.9	6.1	71.7
													5	45.4	25.7	181.2
													7	17.9	16.3	108
													13	32.4	56.9	7.9
													22.8	11.1	102.1	73.4
													18	30.6	32.9	38.7
													11.1	5.4	23.2	121.8
													20.8	21.1	31.2	13.6
													33.8	7.8	10.2	48.1
													13.9	5.1	16.2	242.4
													9.9	13.9	14.8	81.1
													39.3	6.3	18.4	175.1
													22.2	7.7	12	127.8
													10.9	6.5	36.4	548.9
													9	10.1	48.6	73.2
													37.5	13.6	10.9	19.1
													53.5	11.4	14.6	170.9
													27.4	7.8	43	99.9
													21.5	6.7	7.6	19.9
													25.4	18	6.2	286.8
													41.5	17.7	22.3	153.3
													32	9.5	30.4	9.4
													14.2	31.3	9.6	72
													40.1	13.7	14.8	76.8
													20.8	7.2	81.4	542
													41.1	17.1	31.6	24.3
													16.8	18.7	26.7	55.7
													35.3	10.9	39.3	39.3
													5.9	19.3	29.1	115.7
													5.5	30.3	59.8	31.6
													10.2	18.4	10.2	147.1
													26.6	8.3	16.5	51.5
													23.1	31.9	64	256.2
													13.7	15.4	38.5	57.9
													24.2	6.7	13.6	179.9
													26.6	24.6	52.9	15
													10.5	12	25.4	41.7
													51.3	7.7	17.4	81.6
													7	11.2	34.1	103.4
													9.9	12	102.8	6.8
													51.1	8.1	66.8	92.7
													6.8	12.1	29.3	38.7
													21.9	42.5	23.4	38
													24.1	12.7	15.7	147.2
													70.4	17	37.7	37.4
													8.4	21.6	32.8	97.1
													24.1	7.1	69.4	288.2
													22.7	12.2	35.3	116.5
													12.4	12.2	14.9	5.4
													26	44.1	87.7	66
													23.8	15.7	12.1	61.7
													10.4	15.2	6.5	52.5
													87.9	18.9	77.1	159.2
													6.8	11.2	9.8	36.9
													26.3	14.5	14.4	22.2
													5.1	19.3	80.1	7.6
													7.6	6.3	31.6	49.5
													6.2	12.6	32.4	57.2
													11	7.2	38.4	54.5
													6.6	12.9	20.4	19.4
													33.6	49.4	53	252.5
													16.4	12.7	85.4	65.4
													29.7	8.5	26.1	101.9
													34.7	9.8	12.6	9.5
													29.4	22.6	63	135.4
													9.1	8.4	29.8	6.8
													22	6.2	6.3	7.9
													7.6	29.3	50.8	79.6
													10	12.5	36.2	20.1
													24.9	22.6	28.4	96.2
													6.8	5.8	24.3	284.5
													8.6	14.5	15.5	8.3
													12.7	13.2	59.4	81.8
													33.4	8.9	27.7	48.4
													9.1	5.5	29.9	54.6
													10.8	29.7	26.1	6
													43.9	6.5	71.1	52
													22	16.7	35.1	39.9
													13.2	56	17.1	28.8
													24.6	7.8	50.1	160.9
													19.5	16.5	5.5	36
													26.5	15.2	117.1	128.2
													20.6	8.7	23.2	101.8
													38.9	13.7	60	109.8
													8.4	20.6	39.9	22.8
													10.3	130.3	9.2	28.4
													26	14.4	37.7	26.9
													6.9	57.3	35.2	62
													27	195.6	8.3	29.7
													10.1	298.2	5.6	12.8
													8.2	49.3	27.9	48.1
													7.3	4.6	26.6	30.4
													8.7	224.9	12.3	82.3
													11.1	211.1	8.7	22.4
													15.6	35.2	10.7	7.7
													9.2	6.9	5.7	32.2
													23.2	8.5	19.2	22.5
													32.2	6.7	17	4.8
													9.8	29.4	15.4	40.4
													12.3	21.3	9.9	33
													16.3	14.3	9.5	6.6
													18	357.2	9.2	29.7
													9.5	146.3	26.7	14.4
													10.7	281.8	14.7	11.3
													11.8	14.8	9.8	16.3
													7.9	10.6	6.9	70.7
													12.7	7.5	6.8	8.7
													26.3	19.1	40.5	61.7
													17.2	216	14.9	20.7
													6.2	10.9	10	31.8
													15.3	53	7	37
													5.3	265.9	8.3	24.3
													19	169.1	18.6	11
													25.1	49.1	42.1	48.2
													14.7	43.2	8	18.3
													29.3	28.9	9.7	35.8
													15.7	6.4	10.6	11.8
													25.9	86.7	9.6	30.8
													11.6	47.5	19.6	76.2
													9.1	12.6	5.6	144.8
													12.6	124	16.5	12
													11.6	153.3	6.6	21.2
													8.1	11.4	20.4	56.3
													16.1	36.7	8.7	9.3
													5.4	47.7	4.9	10.8
													12	43.9	6.7	9.1
													25	11.5	33.6	42.3
													18.5	21.1	34.4	15.1
													15.2	65.8	12.1	27.7
													6.2	17.6	5.3	28.2
													14.4	211.1	8.6	10.5
													8.3	141.2	8.6	19.2
													21.2	193.1	12.5	25.2
													5.9	287.2	40	58.8
													27.1	226.2	7.8	11.8
													24.3	7.7	5.7	31.2
													16.9	322.9	6.8	10.9
													18.5	259.8	30.4	13.7
													27.1	299.2	16.9	43
													6	52.2	17.2	42.3
													6.6	23.5	16.1	39.6
													14	127.8	45.4	9.5
													27.8	318.9	17.1	62.8
													22.5	57.4	20.3	23.3
													22.6	22.8	10.4	20.4
													17	10	8.4	53.3
													6.7	7.9	8.5	33.6
													13.2	184.2	11.8	11.1
													33.4	74.8	21.4	7.9
													13.5	71.3	20.7	6.7
													16.3	7.1	11.7	36.2
													7.7	57.4	17.6	7.6
													14.1	150.7	13.2	12.2
													18.2	306.3	11.8	14.1
													6.9	388.7	25.9	104.5
													11	42.5	23.5	5.9
													10.9	142.1	7	123.9
													16	299.4	19.6	28.5
													26.1	16.4	8.5	18.6
													18	171.6	13.6	7.2
													12.2	14.8	16	13.6
													7.2	13.2	27.9	86.2
													23.2	51.6	11.7	11.4
													12.3	140.7	10.3	5.8
													30.2	23.1	33.9	40.8
													20	87.1	5.5	6.4
													15.1	170.7	31.6	21.1
													31.3	271.3	18.9	16.1
													9.9	12.8	13	49.1
													18.8	222.6	10.9	20
													20.9	32	6	25.6
													13.3	315.4	25.7	33.7
													7.5	197.5	9.4	5.6
													13	6.6	17.9	16.2
													45.3	9.6	13.7	50.4
													8.9	11.4	10.1	22.5
													16.1	38.2	19.7	25.2
													8	10.5	10.4	21.9
													9.9	20.5	29.7	9.8
													6.4	37.3	24.3	37.4
													5.8	71.7	16.1	5.7
													5.5	318.9	10.9	12.1
													7.5	237.9	23.8	15.7
													17.3	25	20.7	36.5
													36.4	16.7		91
													15.6	11		50.7
													15.2	66.4		81.8
													7.6	13.4		49.4
													21.3	199.4		181.1
													24.6	301		14.3
													9.1	538.7		5.5
													10.7	131.5		13.6
													5	30.4		61.8
													15.4	151.3		8.6
													14.6	76.9		123.8
													12.1	20.9		36.5
													10.5	21.4		77.9
													17.7	10.4		36.1
													5.4	37.8		219.7
													15.8	8.7		64
													5.9	595.4		99.1
													9.9	83.3		98.5
													26.1	1115.5		7.4
													6.8	43.8		25.2
													19.4	15.4		80.1
													8.8	56.5		84.9
													53.3	105.3		172.3
													22.5	305.5		144.4
													7.3	21.2		6.7
													29.4	57.9		6.8
													6.6	29.4		44.6
													12.4	67.9		110.2
													16.1	67.3		32.9
													11.5	37.5		41.3
													6.4	116.5		30
													19.8	187		17.4
													11.9	48.3		70.9
													5.2	53.4		30.4
													6	89.3		30.9
													8	17.7		15.3
													40.4	22.3		107.8
													5.8	72.1		7.5
													17.5	61.9		29
													40.6	168.7		27.7
													14.6	15.4		16.7
													24.5	593		219.5
													5.8	12.9		7.5
													12.6	57.4		71.5
													0	117.2		23.6
													7	293		16.2
													21.5	27.7		82.7
													8.2	21.5		137
													12	48.7		200
													22.1	139.4		26
													8.9	50.9		61.6
													13.7	63.9		12.4
													23.2	81.3		29.5
													11	113		13.5
													26.7	28.1		77.1
													31	71.2		180.4
													11.8	25.6		125.8
													12.9	73.2		21.4
													12.6	72.1		13.8
													12.1	62.6		57.8
													17.1	126.1		26.1
													11.6	510.2		29.9
													7.8	50.2		16.5
													20.3	35.9		51.3
													17.4	60.2		24.3
													6.2	7.7		155.9
													14.9	51		74.2
													17.3	11.2		9.6
													5.7	51.6		161.9
													10.6	155.2		10.4
													7.7	25.7		9.9
													10.3	21.6		5.4
													5.6	142.9		30.9
													24.5	67.9		60.5
													13.4	98.4		66
													6.6	678.4		10.6
													24.5	103.5		144.3
													34.4	68.9		150.1
													5.7	62.2		54.1
													16.6	21		13.8
													9.2	106.1		107.3
													45.4	18.3		23.1
													6.5	137.2		23.6
													6	28.6		22.6
													51.2	99.7		8.7
													20	8.1		40.1
													18.5	7.9		169.8
													12	55		34.9
													9.3	109.3		6.8
													57.6	52.3		36.9
													19.4	48.2		52.1
													17.8	6.9		75.6
													37.2	80		63.3
													40.6	63.1		19.9
													6.7	9.2		162.3
													25	10.8		9.4
													23	99.6		47
													26.7	176.6		32.4
													5	76.5		135.7
													12.1	21.3		97.1
													9.7			47.8
													18.3			23.3
													12.3			5.1
													10.2			138.2
													9.8			45.7
													18.6			167.9
													18.4			13.1
													6.3			50.2
													41.4			230.6
													34.6			21.3
													15.3			253.3
													14			87
													6.4			136.5
													5.7			10.4
													10.8			8.9
													24			56.3
													57			251.2
													14.7			114.8
													24.9			100.2
													109.8			12.3
													33.9			21.5
													17.4			39.5
													16.8			13.8
													17.1			34.6
													15.9			71.1
													42.8			224.2
													6.8			7.9
													6.1			203.2
													6.7			34.2
													19.4			201.2
													32.8			31.1
													6.1			17.9
													6			37
													32.1			12.1
													23.8			24.1
													15.4			58.9
													5.2			20.2
													12.7			144
													32.5			56.5
													30.5			85.2
													10.5			14.5
													8.1			158.6
													23			49.2
													32.2			123
													10.2			35.4
													8.5			30.7
													56.4			51
													24.1			56.1
													15.1			8.4
													6			206.7
													15.5			96.5
													9.5			56.5
													17.4			6.9
													6			96.6
													15.9			141.6
													8.7			47.5
													8			171.2
													8.9			18.2
													20.2			190.7
													13.4			47.5
													20.4			48.1
													10.6			95.1
													12			100.1
													7.3			236.1
													38			96.6
													7.4			90.3
													8.9			179.3
													7.9			8.5
													9.6			15.1
													25.5			135.8
													31.7			8.7
													10.7			44.8
													23.7			25.1
													50.5			56.6
													5.1			129.8
													47			41.4
													9			12.9
													32.2			56
													11.2			21
													8			15.2
													12.8			9.3
													9.9			8
													4.9			7.6
													27.7			181.1
													37.2			39.3
													18.6			224.5
													13.4			8.2
													9.8			16.3
													12.4			9.7
													20			9.9
													24.2			199.3
													26.3			214.7
													8.2			96.1
													15.5			304.2
													17.2			29.9
													16.6			252.8
													13.4			16.8
													6.4			300.6
													61			72.1
													22.9			22.3

## Sheet: Figure 6A-E and G-K
	Figure 6A					Figure 6B					Figure 6C					Figure 6D					Figure 6E					Figure 6G					Figure 6H					Figure 6I					Figure 6J					Figure 6K
	Control	PDT	Anti-PD1	PDT + Anti-PD1		Control	PDT	Anti-PD1	PDT + Anti-PD1		Control	PDT	Anti-PD1	PDT + Anti-PD1		Control	PDT	Anti-PD1	PDT + Anti-PD1		Control	PDT	Anti-PD1	PDT + Anti-PD1		Control	PDT	Anti-PD1	PDT + Anti-PD1		Control	PDT	Anti-PD1	PDT + Anti-PD1		Control	PDT	Anti-PD1	PDT + Anti-PD1		Control	PDT	Anti-PD1	PDT + Anti-PD1		Control	PDT	Anti-PD1	PDT + Anti-PD1
	21.2	20.7	7.95	31.8		1.26	0.25	4.84	2.54		14.2	19.1	21.9	17		0.2	0.13	0.56	0.16		7.38	2.79	5.99	6.92		7.1	3.65	6.92	4.76		4.4	6.32	5.07	5.2		2.53	3.13	2.59	2.98		51.4	44.1	56.5	43.7		3029	3743	3154	3603
	16.3	26.7	20.5	34.2		3.05	2.26	0.12	1.91		12	13.7	26.5	29		0.37	0.27	0.56	0.95		4.67	4.93	3.26	2.53		4.42	4.3	7.9	3.23		6.64	12.4	2.64	8.4		3.33	3.55	1.08	3.81		66	45.1	54	40.8		2961	3952	2883	4047
	17.6	15.2	26.2	38.8		0.82	0.57	3.06	10.1		11.8	21.5	26.2	26.8		0.061	0.17	0.27	0.56		3.7	3.96	4.5	7.85		5.33	3.45	6.49	4.15		3.47	13.9	3.23	4.06		2.07	7.67	1.65	2.71		45.2	43.9	54.3	48.6		3377	4287	2861	3570
			12.2	20.2				3.48	1.57				15.9	20.9				0.092	0.17				2.86	7.14				5.84	2.53				3.45	6.96				2.76	5.33				51	55.6				3047	3713
				16.7					1.33					27.3					0.13					10.6					3.59					10.8					3.39					33.3					3910

## Sheet: Figure 7B-E
	Figure 7B						Figure 7C						Figure 7D					Figure 7E
	Isotype	Control	PDT	Anti-PD1	PDT + Anti-PD1		Isotype	Control	PDT	Anti-PD1	PDT + Anti-PD1		Control	PDT	Anti-PD1	PDT + Anti-PD1		Control	PDT	Anti-PD1	PDT + Anti-PD1
	0.245668	2.70689	1.29921	6.36884	2.79833		0	0.453081	1.13783	0.782237	2.01323		0.493772	0.284948	0.7381	0.478131		12.2	509	14.7	237.5
	0.276663	1.15305	13.8969	1.03835	0.821849		0	0.250189	0.81854	0.277326	1.18521		0.264902	0.35299	0.336891	0.488094		20.5	288.3	48.1	139.6
	0.243506	1.4036	18.7529	8.49904	4.14421			0.17828	0.385172	0.835937	3.08544		0.338301	0.845258	0.537306	0.499253		21.2	100	7.9	176.7
	0.234192		0.989597		4.38444			0.718208	0.564406	0.6698	4.88722		0.27202	0.131031	0.776162	0.434991		35.3	190.4	6.5	293.1
	0.326942		11.3133					0.359826	2.02962		1.81101		0.693505	0.887423	0.117775	0.3784		11.4	225.3	15	273.2
	0.268249										2.76329		0.040703	0.833093	0.436532	0.405002		16.5	386.6	9	105.3
	0.186741												0.858096	0.534742	0.718833	0.555843		10	137.9	23.9	30.5
	0.077483												0.684831	0.253093	0.517567	0.348511		25.5	418.1	26.2	294.4
													0.621886	0.190309	0.162354	0.366643		8.9	203.1	16.5	180.5
													0.260899	0.644021	0.233	0.258842		11.6	15.3	6.2	291.2
													0.202402	0.456907	0.03334	0.596792		15.1	235.6	6.9	138.9
													0.064502	0.337732	0.436815	0.240311		17.2	449.8	42	105.6
													0.735765	0.705567	0.250944	0.374514		36.2	248.9	14.8	451.6
													0.359875	0.173196	0.457971	0.365448		9.8	248.7	41.1	171.6
													0.540703	0.748351	0.310635	0.425027		7.8	478.5	13.3	219
													0.552046	0.287423	0.076879	0.301584		10.8	88.7	31.9	299.4
													0.211521	0.662474	0.33538	0.352297		8.9	411.6	6.5	184.5
													0.015792	0.434433	0.31139	0.465179		15.9	161.2	5.1	37.5
													0.322731	0.091237	0.13997	0.287636		7.2	187.5	6.9	394.4
													0	0.064536	0.162543	0.668028		23.3	121.2	18.1	175
													0.528915	0.495979	0.103419	0.269802		6.5	213.7	17.6	239.7
													0.025578	0.703814	0.201171	0.99731		9.5	54.1	17	235.4
													0.536254	0.321134	0.062996	0.579058		18.2	101.6	9.1	443.8
													0.267794	0.479588	0.444182	0.496762		42.7	248.8	25.6	254.8
													0.425712	0.366392	0.087552	0.790176		10.6	311.4	22.8	264.4
													0.532696	0.349381	0.383359	0.277971		25.3	83.7	15.4	272.5
													0.087856	0.2	0.042973	0.426721		6.8	16.4	12.5	49.6
													0.092304	0.686289	0.289101	0.652486		15.6	127.3	31.6	20.7
													0.550934	0.565052	0.261617	0.216698		7.8	90.1	15.5	98.3
													0.427714	0.666804	0.388175	0.409684		16.6	264.1	9.4	559.1
													0.671486	0.311443	0.387231	0.61622		19.8	273.2	35.6	256.8
													0.236432	0.956701	0.452588	0.231643		6.9	528.6	30.8	302.7
													0.463968	0.155258	0.352663	0.0012952		22.1	509.1	26.1	206.6
													0.450623	0.833196	0.112486	0.209027		18.6	47.8	23.4	33
													0.652135	0.768351	0.250472	0.414765		7	481	18.2	277.9
													0	0.750722	0.012372	0.79177		10.8	297.2	25.9	367.6
													0.101201	0.434227	0.009539	0.43519		12.2	28.4	37.7	260.5
													0.344973	0.170309	0.89337	0.377105		7	75.4	20.3	244.3
													0.108986	0.453814	0.372308	0.279865		13.9	230.1	20.5	95.2
													0.089635	0.619175	0.342369	0.621401		22.9	134.6	20.1	322.6
													0.525356	0.528144	0.508406	0.382385		8.2	380.1	16.8	262.7
													0	0.441443	0.038818	0.602969		26.5	107.4	8.6	239.5
													0.576957	0.042474	0.788251	0.0977384		7	79.1	22.1	147.1
													0.71597	0.550825	0.462883	0.349706		39.8	182.2	25.1	255.5
													0.531139	0.127216	0.456177	0.463087		35.9	232.7	22.6	43.6
													0	0.381856	0.349358	0.653781		18.3	466.1	34.2	421.8
													0.833407	0.984021	0.637231	0.560327		8.2	52.3	13	219.9
													0.553158	0.288247	0.664431	0.837402		9.1	0	47.6	223
													0.791148	0.197629	0.378542	0.375013		7	510	13.5	19.9
													0.288701	0.835567	0.199566	0.175949		11.3	190.5	11.6	142.1
													0.120255	0.909344	0.340982	0.748471		16.1	437.7	48.1	137
													0.168334	0.338639	0.410624	0.376766		9.8	262.8	21.8	216.1
													0.058763	0.133783	0.094654	0.431372		16.9	350.6	41.1	143.9
													0.08286	0.487531	0.316659	0.555134		10	184.3	40.9	158.3
													0.12571	0.302699	0.30335	0.311195		10.6	290.9	32.6	141.4
													0.114003	0.569019	0.556333	0.252794		12	339	11.9	195.8
													0.515458	0.295291	0.265718	0.331225		5.9	156.8	7.9	64.5
													0.217549	0.741455	0.302777	0.430951		11.8	128.1	8.2	304.5
													0.229143	0.371718	0.504245	0.262281		37.1	242	36.1	170.6
													0.114685	0.998093	0.327214	0.436222		11.6	121.1	10.7	252.6
													0.402137	0.539827	0.069183	0.676787		10.4	113.7	11.9	52.2
													0.85474	0.787663	0.174277	0.297913		22.6	311.4	8.3	154.5
													0.123323	0.623441	0.130679	0.145478		23	49.2	39.1	105.1
													0.006138	0.797345	0.228775	0.064727		50.5	152.8	13.6	246.8
													0.441578	0.780622	0.257687	0.287582		17.7	66.8	8.4	215.4
													0.236758	0.469561	0.247935	0.945182		11.4	142.9	13.5	114.1
													0.195726	0.650433	0.27157	0.343875		6.5	288.5	42.5	171.1
													0.248125	0.352281	0.369894	0.0303605		18.1	153	10	81
													0.463742	0.901863	0.241395	0.461311		10.8	285.9	31.2	144.8
													0.152307	0.205956	0.06184	0.460257		9.4	421.7	30	67.6
													0.313139	0.467361	0.004589	0.71031		14.6	128.9	43.8	155.4
													0.016595	0.604225	0.24128	0.0137044		16	448.2	12.9	190.3
													0.097068	0.700968	0.251836	0.0584019		6.5	272	38.2	215.9
													0.420891	0.353895	0.217875	0.449715		24.5	367.7	27.4	249.2
													0.049784	0.000733	0.37391	0.41303		11.4	250.5	48.8	199.8
													0.159923	0.319349	0.700092	0.216951		10.2	141.1	27.7	128.9
													0.437372	0.281796	0.692749	0.255324		6.7	214.5	15.9	66.2
													0.256081	0.638037	0.461794	0.0257221		22.6	289.3	35.6	162.7
													0.359173	0.345093	0.247132	0.361164		7.2	331	23.7	57.9
													0.001478	0.258765	0.435406	0.742146		14.3	274.8	21.9	27.7
													0.534894	0.567185	0.153167	0.338604		10.8	116.6	20.9	131.6
													0.361446	0.144492	0.094654	0.202193		18.2	47.5	15.9	254.6
													0.323824	0.247763	0.669458	0.20662		17	161.8	26.5	212.7
													0.030802	0.766613	0.327788	0.184904		43.3	368.9	33	225.4
													0.402478	0.694367	0.153396	0.376766		5.9	229.1	16.1	158.1
													0.185951	0.186006	0.514915	0.259119		11.6	173.5	48.4	38.7
													0.668675	0.392328	0.100161	0.430318		15.1	413.7	30.4	135.9
													0.562173	0.197007	0.406838	0.244149		23.4	137.2	22.4	86.6
													0.231985	0.614787	0.081574	0.797807		9.5	379.6	12.6	44.7
													0.277904	0.216297	0.318724	0.318364		5.2	108.9	21.1	197.4
													0.619345	0.871938	0.516866	0.211259		19.5	183.9	20.3	294.8
													0.533303	0.070632	0.398004	0.362429		11.8	355.8	57.8	45.2
													0.02421	0.29089	0.466269	0.0303605		15.5	471.8	42.2	48.5
													0.603774	0.890568	0.090523	0.400801		7.3	503.8	53.3	164.3
													0.238236	0.744096	0.00436	0.328906		7.2	555.7	15.2	102.3
													0.254035	0.595643	0.298073	0.464052		9.3	132.4	29.4	73.3
													0.316436	0.199355	0.420835	0.147797		8.9	39.4	37.3	70.8
													0.291657	0.80512	0.203763	0.353995		10.4	471.3	49.7	87.9
													0.377131	0.373331	0.050941	0.933586		8.5	414.4	35.4	105.2
													0.485679	0.395482	0.10911	0.751634		29	355	76.8	170.4
													0.37407	0.500371	0.149154			50.9		6
													0.258475	0.632946	0.246247			8.4		22.5
													0.741359	0.146838	0.358161			7.7		13
													0.099884	0.518015	0.353981			15.9		48.3
													0.88639	0.224503	0.017101			35.6		7
													0.274847	0.732789	0.073342			27.3		59.8
													0.546387	0.590321	0.440433			14.3		8
													0.170332	0.494105	0.476534			12		36.9
													0.322143	0.535164	0.813414			12.2		28.3
													0.704647	0.360623	0.548356			37.2		27.2
													0.726145	0.149312	0.292609			75.1		9.2
													0.603605	0.363014	0.250428			11.7		10.4
													0.452787	0.693792	0.145734			27.6		17.5
													0.882421	0.639129	0.045031			7.6		70.4
													0.54804	0.78234	0.33403			30.3		10
													0.452787	0.134059	0.249477			10.1		22.1
													0.459401	0.607717	0.160745			34.2		17.1
													0.484869	0.407206	0.060802			40.2		35.6
													0.458409	0.569544	0.362341			23.1		23.9
													0.744667	0.57177	0.225917			15.9		22
													0.57698	0.854069	0.253468			55.8		60.8
													0.404167	0.598236	0.732662			22.4		31.8
													0.350587	0.852255	0.204066			5.6		44.9
													0.432611	0.480584	0.233137			20.8		29.7
													0.441707	0.73551	0.123694			8.8		22.4
													0.526377	0.170006	0.227247			31.9		10.7
													0.526707	0.800148	0.750143			13.2		10.1
													0.429635	0.654794	0.771233			20.1		21.1
													0.250041	0.427323	0.3498			47.2		50.4
													0.049777	0.224421	0.33403			29		20.8
													0.112949	0.796109	0.243587			26.2		41.7
													0.135108	0.633193	0.139274			14.1		58.7
													0.300149	0.857532	0.103173			11.5		29.2
													0.727964	0.68835	0.141934			51.2		11
													0.188358	0.249814	0.730952			28.4		46.5
													0.312221	0.064886	0.165495			23.3		31.1
													0.331239	0.613406	0.118944			33.7		66
													0.536299	0.03438	0.038761			24.9		31.9
													0.292046	0.105367	0.00969			9.9		5.9
													0.7149	0.090197	0.68117			29.2		30.2
													0.385811	0.130761	0.143454			37.4		75
													0.16719	0.632863	0.247957			30.4		37.9
													0.14255	0.141644	0.193426			12.5		9.4
													0.867703	0.863385	0.311799			7.7		17.6
													0.716388	0.188721	0.304959			44.3		36.3
													0.51877	0.772529	0.196846			28.8		39.8
													0.999669	0.279743	0.315029			35.3		12.5
													0.020175	0.806909	0.394642			7.8		12.6
													0.110137	0.191277	0.6673			12.8		28.6
													0.428642	0.94171	0.248527			12.3		14.9
													0.727741					29.7
													0.068693					19.5
													0.384905					27.6
													0.416552					24.8
													0.612583					7.1
													0.382017					10.7
													0.287078					21.3
													0.295994					17.8
													0.396584					36.1
													0.472058					24.7
													0.236218					43.1
													0.935577					28.3
													0.154716					50.5
													0.280045					6.3
													0.08439					28.7
													0.069446					26.2
													0.178074					19.8
													0.620495					19.3
													0.642095					70.6
													0.012684					13.4
													0.255431					41
													0.352254					24.5
													0.263845					9.7
													0.543765					9.4
													0.144418					18
													0.252417					48.6
													0.212483					17.6
													0.175688					18
													0.376868					17.3
													0.613839					34.2
													0.159739					31.6
													0.265101					16.5
													0.002637					100
													0.251915					54.2
													0.104106					10.3
													0.477082					13.8
													0.531207					23.1
													0.35891					21.7
													0.410398					12.9
													0.156223					6.1
													0.856336					27.5
													0.876428					30.7
													0.816903					33.9
													0.146302					33.3
													0.209594					21.3
													0.450082					70.1
													0.097827					32.1
													0.158985					37.6
													0.278664					13.3
													0.829336					60.5

## Sheet: Figure S1A and S1B
	Figure S1A					Figure S1B
	%Necrosis	%Collagen				Control	PDT	Anti-PD1	PDT + Anti-PD1
	-7.01953	5.654				74.0789	87.8787	90.9168	92.6537
	42.0039	13.566				75.6644	92.0202	72.0416	79.9689
	45.9526	9.127				79.3183	78.909	79.3316	95.9831
	36.778	7.476				74.4506	82.3891	76.2132	70.9351
	-11.6464	7.967
	-8.09341	5.464
	3.83241	4.897
	-9.66281	3.933
	6.399	5.118
	38.5123	17.154
	48.3266	20.243
	46.4777	18.383
	54.7433	18.085
	52.0615	23.255
	53.3388	22.295

## Sheet: Figure S2B-J
	Figure S2B			Figure S2C - CD140+ cells			Figure S2D - PDAC-mcherry+ cells			Figure S2E - F4-80+ cells			Figure S2F - CD11c+ cells			Figure S2G - F4-80+ CD11c+ cells			Figure S2H - CD31+ cells			Figure S2I - CD4+ cells			Figure S2J - CD8+ cells
	Visudyne treated	Untreated		Visudyne treated	Untreated		Visudyne treated	Untreated		Visudyne treated	Untreated		Visudyne treated	Untreated		Visudyne treated	Untreated		Visudyne treated	Untreated		Visudyne treated	Untreated		Visudyne treated	Untreated
	5.82	1.34		23.2	3.58		9.62	3.76		54.3	2.89		42.8	2.46		45.1	1.4		6.15	0.78		2.82	0.85		0.9	1.84
	9.76	2.06		35.2	6.1		24.2	13.2		56.5	3.85		46.9	2.62		41.1	1.53		7.71	1.1		3.73	2.03		2.01	3.02
	10.1	2.35		29.7	7.84		27.6	14		55.9	5.77		47.5	3.35		34.8	1.78		4.94	1.67		3.79	1.99		4.86	4.57
	5.55	1.61		18.7	4.92		20.6	6.43		58	4.86		38.6	2.68		35	2.24		5.96	1.95		4.01	1.99		2.29	0.99
	6.61	3.03
	11.4	3.64
	10.5	3.46
	6.7	3.6

## Sheet: Figure S3A-J
	Figure S3A					Figure S3B					Figure S3C					Figure S3D					Figure S3E					Figure S3F					Figure S3G					Figure S3H					Figure S3I					Figure S3J
	Control	PDT	Anti-PD1	PDT + Anti-PD1		Control	PDT	Anti-PD1	PDT + Anti-PD1		Control	PDT	Anti-PD1	PDT + Anti-PD1		Control	PDT	Anti-PD1	PDT + Anti-PD1		Control	PDT	Anti-PD1	PDT + Anti-PD1		Control	PDT	Anti-PD1	PDT + Anti-PD1		Control	PDT	Anti-PD1	PDT + Anti-PD1		Control	PDT	Anti-PD1	PDT + Anti-PD1		Control	PDT	Anti-PD1	PDT + Anti-PD1		Control	PDT	Anti-PD1	PDT + Anti-PD1
	2.47	1.76	3.99	2.03		1.07	1.75	1.38	2.36		2.74	0.78	2.49	2.02		9136	9817	25824	4211		1633	1888	2438	1394		19.2	8.86	12.9	22.8		0.16	0.14	0.078	0.18		17.6	15.1	17.8	16.2		4.27	3.76	1.61	3.99		4.39	3.24	3.19	4.45
	2.36	1.44	9.34	1.42		2.76	3.29	0.86	2.57		4.1	1.36	1.31	1.35		14383	6446	21310	5762		2301	1661	2400	1475		3.58	3.67	3.27	9.48		0.12	0.09	0.13	0.13		10.8	9.21	8.35	14.4		1.51	3.71	4.89	7.08		3.5	4.27	3.85	4.58
	1.79	1.65	2.39	1.99		1.42	3.46	1.09	0.65		0.88	1.22	1.85	1.74		12101	9014	8117	4761		1788	1825	1579	1478		4.67	7.81	11.3	13.9		0.096	0.22	0.1	0.13		8.77	14.4	10.2	16.8		2.05	4.87	2.08	2.19		3.32	4.9	2.53	3.54
			4.06	1.85				0.66	2.55				1.36	1.09				20715	11146				2438	1856				10.2	4.54				0.21	0.19				9.13	14.1				3.64	2.49				3.22	3.69
				1.92					2.68					1.85					16887					1998					15.4					0.33					19.2					6.27					4.8

## Sheet: Figure S4A and S4C
	Figure S4A									Figure S4B
	Sample	Light dose (J/cm2)	n1	n2	n3	n4	n5	n6			Control-1	Control-2		Treatment-1	Treatment-2
	Control	0	100	100	100	100	100	100		I-TAC/CXCL11	471	533		158.5	152.5
	C+PS	0	83.7443	120.029	104.84	97.2818	107.881	103.708		G-CSF	843	844		249.5	260.5
	C+light	0	98.6153	123.67	102.046	91.9706	106.508	106.493		IL-5	566	621		377.5	377.5
	1	1	67.744	79.5136	80.5616	70.0476	102.901	80.3786		GM-CSF	2963	3002		1397.5	1315.5
	2.5	2.5	39.645	49.241	48.9856	44.0121	70.7383	37.9436		M-CSF	1523	1443		692.5	789.5
	5	5	25.9424	30.5822	29.4946	32.2687	47.2061	21.428		JE/CCL2	3512	3340		946.5	988.5
	7.5	7.5	24.3385	25.969	14.2576	35.8241	36.4939	12.2641		ICAM1/CD54	819	812		184.5	174.5
	10	10	24.1252	39.6168	11.0074	33.2276	33.894	15.4116		MIP2	1669	1835		1053.5	1055.5
	15	15	30.4388	47.9587	13.847	25.5708	23.894	11.9156		IL-1ra	1824	1845		3641.5	3428.5
	20	20	19.5837	46.1459	9.18217	23.841	25.0405	13.9508		IL-23	129	143		288.5	249.5
	25	25	23.0769	28.9904	13.3731	20.9162	28.2079	11.0151
	50	50	24.7319	29.6389	16.2654	21.0969	21.7284	15.8995

[truncated: 1 more sheets: Figure S5B-E]
